# Supplementary material
Source: PubMed Central journal article supplement (PMC3928573)
Supplement: NIHMS494273-supplement-1.pdf [file NIHMS494273-supplement-1.pdf]

**Table S1. Target Sequences Used for siRNA, Related to Experimental Procedures**

| siRNA sequences |                            |
|-----------------|----------------------------|
| GTF3A           | 5'-CACUAGGCAUGCUGUUGUA-3'  |
| Polr1a          | 5'-CAACUACGAGGUGAUAUGAA-3' |
| hRRS1           | 5'-GAACUUAUUUGAGGAUUUA-3'  |
| BXDC1           | 5'-AUAUUUCCCAUGAUACUUU-3'  |

**Table S2. Sequence of Primers Used for Quantitative Real-Time PCR and Northern Blot Analysis, Related to Experimental Procedures**

| qRT-PCR primers     |                                                                       |
|---------------------|-----------------------------------------------------------------------|
| GTF3A<br>(forward)  | 5'-TTGTGTGTGAACATGCTGGCTGTG-3'                                        |
| GTF3A<br>(reverse)  | 5'-TGAGATGAGAGGCCAAACTCCGTT-3'                                        |
| Polr1a<br>(forward) | 5'-ATGTGTTTGCCGTGTATGGCATCG-3'                                        |
| Polr1a<br>(reverse) | 5'-GCATGGTGGCTTGC TTCAGAAACT-3'                                       |
| hRRS1<br>(forward)  | 5'-TTCCCACAACCGAGACTTTGGAGA-3'                                        |
| hRRS1<br>(reverse)  | 5'-AGAACTCATTCCCGGTTTCCACCA-3'                                        |
| BXDC1<br>(forward)  | 5'-GGA GGACACACCTGGCATCGG-3'                                          |
| BXDC1<br>(reverse)  | 5'-TGCAGGTCGCTTCTTCAACCC-3'                                           |
| Northern probe      |                                                                       |
| ITS2                | 5'GAGGGAGGAACCCGGACCGCAGGCGGCGGCCACGGGAAC<br>TCGGCCCGAGCCGGCTCTCTC-3' |
